# Supplementary material
Source: Springer Nature journal article supplement (https://www.springermedizin.de/resource/supplementary/12936_2013_3025_MOESM6_ESM.pdf/9544848)

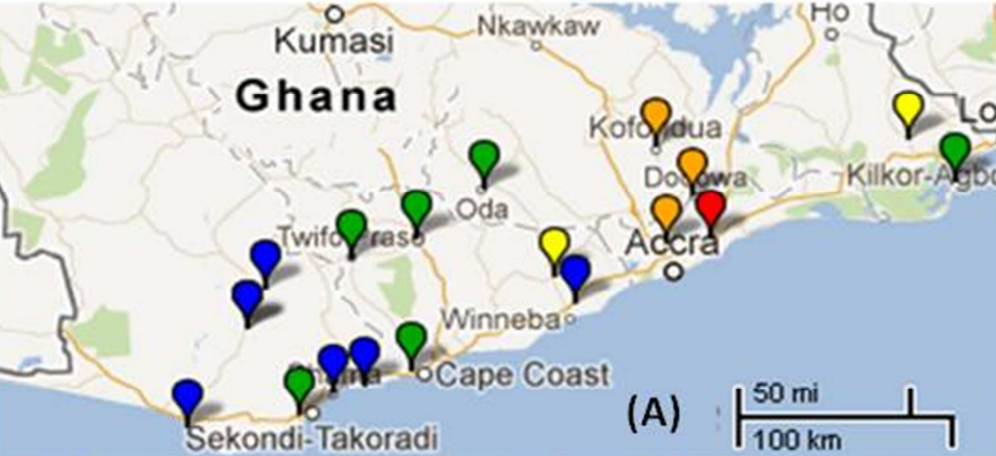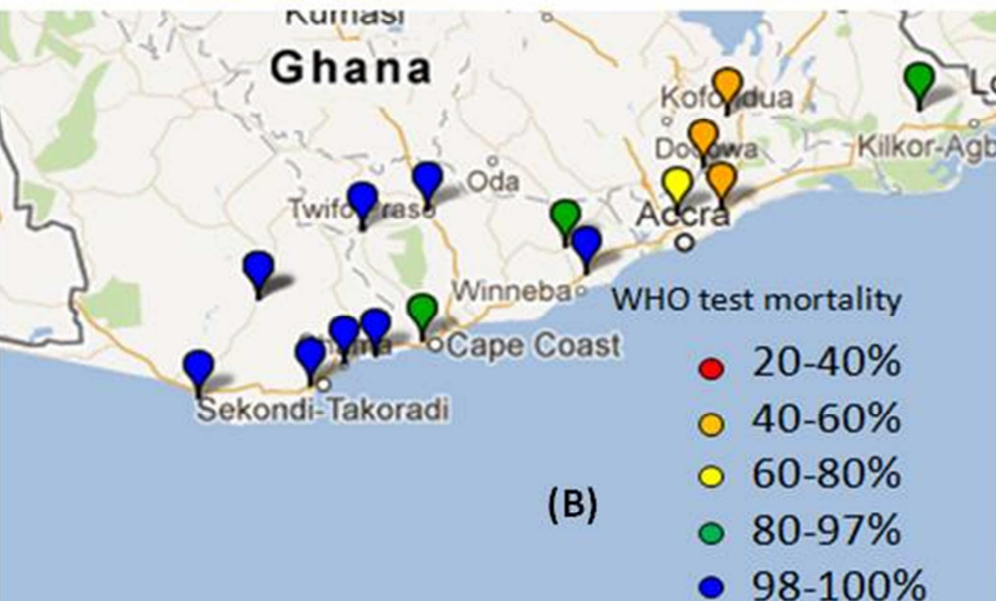

Supplement: MOESM6 [file 9544848]
